# Supplementary material for: The Diterpenoid 7-Keto-Sempervirol, Derived from Lycium chinense, Displays Anthelmintic Activity against both Schistosoma mansoni and Fasciola hepatica
Source: PubMed Central journal article supplement (PMC4358835; doi:10.1371/journal.pntd.0003604), 2015-03-13

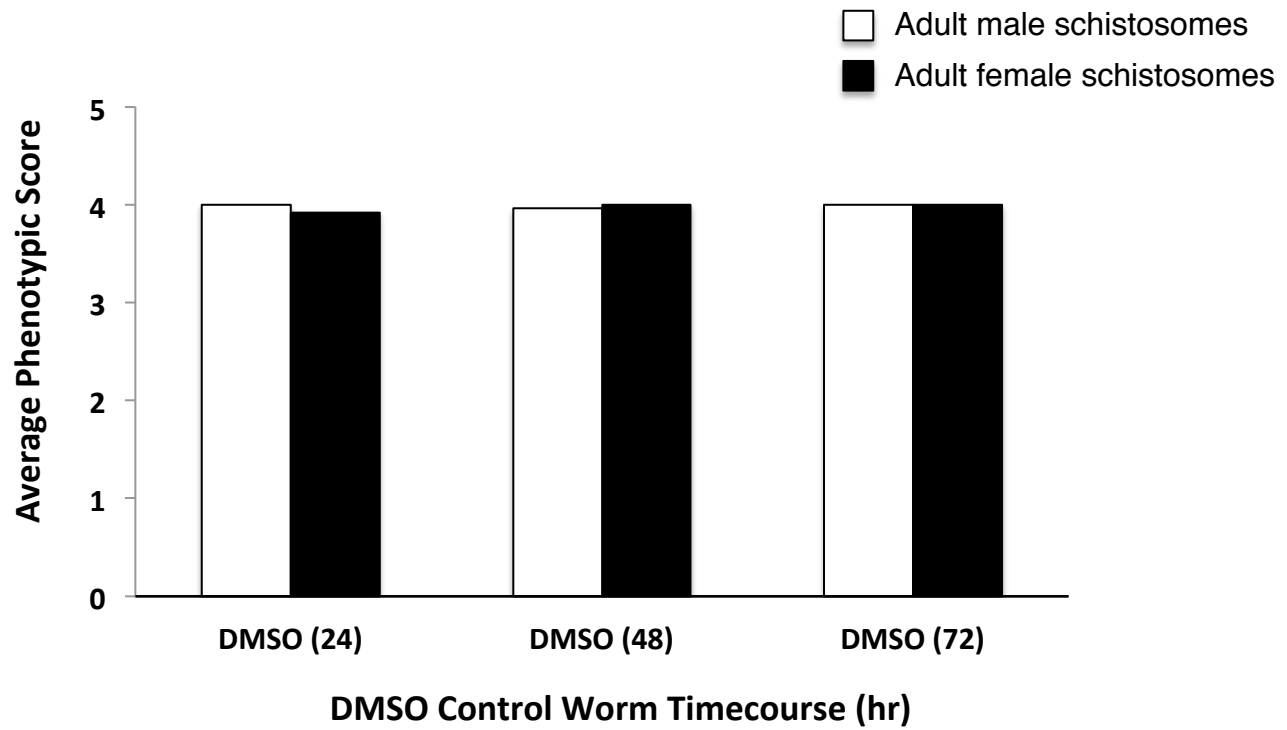

Supplement: pntd.0003604.s002.pdf [file pntd.0003604.s002.pdf]
